# Supplementary material for: Pancreatic Cancer Cell-Conditioned, Human-Derived Primary Myotubes Display Increased Leucine Turnover, Increased Lipid Accumulation, and Reduced Glucose Uptake
Source: MDPI journal article supplement (doi:10.3390/metabo12111095), 2022-11-10
Supplement: s1 [file s1]

**Supplementary Table S1. Description of primers.**

| <b>Gene</b>          | <b>Acc.no.</b> | <b>Forward sequence</b>  | <b>Reverse sequence</b>     |
|----------------------|----------------|--------------------------|-----------------------------|
| <b><i>CD36</i></b>   | L06850         | AGTCACTGCGACATGATTAATGGT | CTGCAATACCTGGCTTTTCTCAA     |
| <b><i>GAPDH</i></b>  | NM_002046      | TGCACCAACCTGCTTAGC       | GGCATGGACTGTGGTCATGAG       |
| <b><i>SLC2A4</i></b> | M20747         | ACCCTGGTCCTTGCTGTGTT     | ACCCCAATGTTGTACCCAAACT      |
| <b><i>MYH2</i></b>   | NM_005963      | CCAGACTGTGTCTGCTCTCTTCAG | CAGGACAAGCTCATGCTCCAT       |
| <b><i>MTOR</i></b>   | NM_001386500   | CCGAGCGACGAGAGATCATC     | ACTTGAGCCAGGTTCTCATGTCT     |
| <b><i>MYOD1</i></b>  | BC064493       | GCGCCCAAAAGATTGAACTTA    | CCGCCTCTCTACCTCAAGA         |
| <b><i>MAPK8</i></b>  | NM_001278547   | CTGGTCAGCAGGGTGTCAACA    | TCGCAGAGGGAGAAAAGCAA        |
| <b><i>NFκB</i></b>   | NM001165412.1  | ACGAGCTCCGAGACAGTGACA    | GAGACTCGGTAAAGCTGAGTTTGC    |
| <b><i>PPARA</i></b>  | L02932         | TCCACCTGCAGAGCAACCA      | CCGGAGGTCTGCCATTTTT         |
| <b><i>PPARD</i></b>  | BC002715       | AGCATCCTCACCGGCAAA       | ATGTCTCGATGTGATGTCGTGGATCAC |
| <b><i>PPARG</i></b>  | L40904         | AGCCTGCGAAAGCCTTTTG      | ATTCCAGTGCATTGAACTTCACA     |
| <b><i>RPLP0</i></b>  | M17885         | CCATTCTATCATCAACGGGTACAA | AGCAAGTGGGAAGGTGTAATCC      |
| <b><i>UQCRB</i></b>  | NM_006294.4    | AAGGTCCAAGGTCTCCTCTCTTC  | CATCTCCAGCAGGTACTTCACTCA    |

Primers were designed using Primer Express® (Applied Biosystems). *CD36*, cluster of differentiation 36; *GAPDH*, glyceraldehyde 3-phosphate dehydrogenase; *SLC2A4*, solute carrier family 2 member 4; *MYH2*, myosin heavy chain 2; *MTOR*, mechanistic target of rapamycin kinase; *MYOD1*, myoblast determination protein 1; *MAPK8*, mitogen-activated protein kinase 8; *NFκB*, nuclear factor kappa B; *PPARA/D/G*, peroxisome proliferator-activated receptor alpha/delta/gamma; *RPLP0*, ribosomal protein lateral stalk subunit P0; *UQCRB*, ubiquinol-cytochrome c reductase binding protein.
